# Supplementary material for: Spatio-Temporal Distribution of Mycobacterium tuberculosis Complex Strains in Ghana
Source: PubMed Central journal article supplement (PMC5001706; doi:10.1371/journal.pone.0161892), 2016-08-26
Supplement: pone.0161892.s001.pdf [file pone.0161892.s001.pdf]

**S1 Table. Districts and population statistics within designated time points within the study period**

| District/sub-district                  | Abbreviation | Region              | 2010    | 2012†   | 2013†   | 2014†   |
|----------------------------------------|--------------|---------------------|---------|---------|---------|---------|
| <b>Accra Metropolis</b>                | AMA          | Greater Accra       | 1665086 | 1771589 | 1827368 | 1884904 |
| <b>Ablekuma*</b>                       | Able         | Greater Accra (AMA) | 679362  | 722816  | 745574  | 769049  |
| <b>Ashiedu Keteke*</b>                 | AshK         | Greater Accra (AMA) | 117525  | 125042  | 128979  | 133040  |
| <b>Ayawaso*</b>                        | Ayaw         | Greater Accra (AMA) | 396487  | 421847  | 435129  | 448830  |
| <b>Okaikoi*</b>                        | Okai         | Greater Accra (AMA) | 349989  | 372375  | 384100  | 396193  |
| <b>Osu Klottey*</b>                    | OsuK         | Greater Accra (AMA) | 121723  | 129509  | 133586  | 137792  |
| <b>Kpeshie</b>                         | Kpes         | Greater Accra       | 411460  | 437778  | 451562  | 465779  |
| <b>Adenta Municipal</b>                | AdeM         | Greater Accra       | 78215   | 83218   | 85838   | 88541   |
| <b>La-Nkwantanang Madina Municipal</b> | LaNM         | Greater Accra       | 111926  | 119085  | 122835  | 126702  |
| <b>Ga Central Municipal</b>            | GaCM         | Greater Accra       | 117220  | 124718  | 128644  | 132695  |
| <b>Ga East Municipal</b>               | GaEM         | Greater Accra       | 147742  | 157192  | 162141  | 167246  |
| <b>Ga South Municipal</b>              | GaSM         | Greater Accra       | 411377  | 437690  | 451471  | 465685  |
| <b>Ga West Municipal</b>               | GaWM         | Greater Accra       | 219788  | 233846  | 241209  | 248804  |
| <b>Mamprusi East</b>                   | MamE         | Northern            | 121009  | 128235  | 132008  | 135893  |
| <b>Tamale Metropolis</b>               | TamM         | Northern            | 371351  | 393526  | 405106  | 417026  |
| <b>Gomoa East</b>                      | GomE         | Central             | 207071  | 220316  | 227252  | 234408  |
| <b>Agona West Municipal</b>            | AgWM         | Central             | 115358  | 122737  | 126601  | 130587  |
| <b>Ewutu Senya</b>                     | AwuS         | Central             | 195306  | 207798  | 214341  | 221089  |

The last population census conducted in Ghana was in 2010. As a results, to obtain the population statistics for the period 2012 to 2014 (columns 5 to 7) we used the exponential growth rate formulae as described in methods. The intercensal growth rates used per region were: Greater Accra (3.1%), Central region (3.1%), Northern region (2.9%).

\*sub-districts within AMA; †Projected population from 2010 population census data.
