# Supplementary material for: Spatio-Temporal Distribution of Mycobacterium tuberculosis Complex Strains in Ghana
Source: PubMed Central journal article supplement (PMC5001706; doi:10.1371/journal.pone.0161892), 2016-08-26
Supplement: pone.0161892.s002.pdf [file pone.0161892.s002.pdf]

**S2 Table. Annual distribution of TB cases used for spatial or space-time analysis (2007 – 2014)**

| <b>District/sub-district</b>     | <b>2007</b> | <b>2008</b> | <b>2009</b> | <b>2010</b> | <b>2011</b> | <b>2012</b> | <b>2013</b> | <b>2014</b> | <b>Total per district</b> |
|----------------------------------|-------------|-------------|-------------|-------------|-------------|-------------|-------------|-------------|---------------------------|
| <b>Accra Metropolis</b>          | N/A         | N/A         | N/A         | 119         | 141         | N/A         | N/A         | N/A         | 260                       |
| <b>Ablekuma*</b>                 | N/A         | N/A         | N/A         | 7           | 2           | 72          | 174         | 153         | 408                       |
| <b>Ashiedu Keteke*</b>           | N/A         | N/A         | N/A         | 5           | N/A         | 18          | 53          | 31          | 107                       |
| <b>Ayawaso*</b>                  | N/A         | N/A         | N/A         | N/A         | N/A         | 32          | 90          | 71          | 193                       |
| <b>Okaikoi*</b>                  | N/A         | N/A         | N/A         | N/A         | N/A         | 30          | 62          | 46          | 138                       |
| <b>Osu Klottey*</b>              | N/A         | N/A         | N/A         | 1           | N/A         | 17          | 70          | 24          | 112                       |
| <b>Kpeshie*</b>                  | N/A         | N/A         | N/A         | 38          | 25          | 34          | 86          | 51          | 234                       |
| <b>Adenta Municipal</b>          | N/A         | N/A         | N/A         | N/A         | N/A         | 4           | 3           | 3           | 10                        |
| <b>La-Nkwantanang<br/>Madina</b> | N/A         | N/A         | N/A         | N/A         | N/A         | 2           | 12          | 6           | 20                        |
| <b>Ga Central<br/>Municipal</b>  | N/A         | N/A         | N/A         | N/A         | N/A         | 4           | 11          | 16          | 31                        |
| <b>Ga East Municipal</b>         | N/A         | N/A         | N/A         | N/A         | N/A         | 15          | 23          | 11          | 49                        |
| <b>Ga South Municipal</b>        | N/A         | N/A         | N/A         | N/A         | N/A         | 4           | 17          | 18          | 39                        |
| <b>Ga West Municipal</b>         | N/A         | N/A         | N/A         | 1           | N/A         | 6           | 19          | 11          | 37                        |
| <b>Mamprusi East</b>             | N/A         | N/A         | N/A         | N/A         | N/A         | 7           | 42          | 44          | 93                        |
| <b>Tamale Metropolis</b>         | N/A         | N/A         | N/A         | N/A         | N/A         | N/A         | 8           | 37          | 45                        |
| <b>Agona West<br/>Municipal</b>  | 2           | 57          | 31          | 22          | 6           | N/A         | N/A         | N/A         | 118                       |
| <b>Ewutu Senya</b>               | 8           | 59          | 18          | 17          | N/A         | 7           | 35          | 21          | 165                       |
| <b>Gomoa East</b>                | 1           | 13          | 6           | 3           | N/A         | N/A         | N/A         | N/A         | 23                        |
| <b>Total per year</b>            | 11          | 129         | 55          | 213         | 174         | 252         | 705         | 543         | 2082                      |

The table lists the number of tuberculosis cases sampled within each district/sub-district for only participants with residential status. Periods within the 8 year study period where no sampling was done are marked N/A (not available). The final column and row contains total counts for each district/sub-district and year respectively.

*\*sub-districts within AMA.*
