# Supplementary material for: Spatio-Temporal Distribution of Mycobacterium tuberculosis Complex Strains in Ghana
Source: PubMed Central journal article supplement (PMC5001706; doi:10.1371/journal.pone.0161892), 2016-08-26
Supplement: pone.0161892.s003.pdf [file pone.0161892.s003.pdf]

**S3 Table. Lineage distribution of isolated MTBC recruited and used for spatial or space-time analysis (2007 – 2014)**

| Districts/ sub-districts            | TB Species/Lineages/Sub-lineages |     |      |     |     |     |     |        | Total |
|-------------------------------------|----------------------------------|-----|------|-----|-----|-----|-----|--------|-------|
|                                     | MTBss                            | Maf | L4   | L5  | L6  | Gh  | Cam | Animal |       |
| <b>Accra Metropolis (2010/2011)</b> | 215                              | 45  | 207  | 35  | 10  | 0   | 155 | -      | 260   |
| <b>Ablekuma*</b>                    | 315                              | 90  | 292  | 59  | 31  | 72  | 168 | 3      | 408   |
| <b>Ashiedu Keteke*</b>              | 81                               | 26  | 79   | 12  | 14  | 20  | 46  | -      | 107   |
| <b>Ayawaso*</b>                     | 149                              | 43  | 143  | 26  | 17  | 29  | 92  | 1      | 193   |
| <b>Okaikoi*</b>                     | 109                              | 28  | 105  | 16  | 12  | 25  | 59  | 1      | 138   |
| <b>Osu Klottey*</b>                 | 87                               | 24  | 72   | 15  | 9   | 10  | 46  | 1      | 112   |
| <b>Kpeshie*</b>                     | 182                              | 51  | 168  | 43  | 8   | 27  | 101 | 1      | 234   |
| <b>Adenta Municipal</b>             | 6                                | 4   | 5    | 3   | 1   | 2   | 1   | -      | 10    |
| <b>La-Nkwantanang Madina</b>        | 17                               | 3   | 17   | 2   | 1   | 3   | 13  | -      | 20    |
| <b>Ga Central Municipal</b>         | 27                               | 4   | 27   | 2   | 2   | 3   | 18  | -      | 31    |
| <b>Ga East Municipal</b>            | 38                               | 11  | 36   | 6   | 5   | 7   | 24  | -      | 49    |
| <b>Ga South Municipal</b>           | 31                               | 8   | 29   | 6   | 2   | 8   | 17  | -      | 39    |
| <b>Ga West Municipal</b>            | 31                               | 5   | 25   | 3   | 2   | 7   | 15  | 1      | 37    |
| <b>Agona West Municipal</b>         | 105                              | 13  | 102  | 10  | 3   | 0   | 63  | -      | 118   |
| <b>Ewutu Senya</b>                  | 127                              | 36  | 118  | 26  | 10  | 7   | 77  | 2      | 165   |
| <b>Gomoa East</b>                   | 18                               | 5   | 15   | 3   | 2   | 0   | 9   | -      | 23    |
| <b>Mamprusi East</b>                | 79                               | 13  | 69   | 7   | 6   | 28  | 27  | -      | 92    |
| <b>Tamale Metropolis</b>            | 34                               | 10  | 32   | 4   | 6   | 9   | 18  | 1      | 45    |
| <b>Total</b>                        | 1651                             | 420 | 1541 | 279 | 141 | 257 | 949 | 11     | 2082  |

The table lists the distribution of tuberculosis species/major lineages/sub-lineages sampled within each district/sub-district for only participants with well-defined residential status. The final column and row contains total counts for each district/sub-district and TB species/lineage/sub-lineage respectively.

Abbreviations: TB, tuberculosis; MTBss, Mycobacterium tuberculosis sensu stricto; Maf, Mycobacterium africanum; L4, Lineage 4; L5, Lineage 5; L6, Lineage 6; Gh, Ghana genotypes (Ghana sub-lineage); Cam, Cameroon sub-lineage.

\*sub-districts within Accra metropolis.
