# Supplementary material for: Spatio-Temporal Distribution of Mycobacterium tuberculosis Complex Strains in Ghana
Source: PubMed Central journal article supplement (PMC5001706; doi:10.1371/journal.pone.0161892), 2016-08-26
Supplement: pone.0161892.s004.pdf [file pone.0161892.s004.pdf]

**S4 Table. Default parameters used in SaTScan for clustering analysis**

| <b>Category</b>        | <b>Parameters</b>             | <b>Settings</b>                                                                                                    |
|------------------------|-------------------------------|--------------------------------------------------------------------------------------------------------------------|
| <b>Input</b>           | Time precision                | Year                                                                                                               |
|                        | Coordinates                   | Latitude/Longitude                                                                                                 |
| <b>Data checking</b>   | Temporal data check           | Check to ensure that all cases and controls are within the specified temporal study period                         |
|                        | Geographical data check       | Check to ensure that all observations (cases, controls and populations) are within the specified geographical area |
| <b>Analysis</b>        | Time aggregation units        | Year                                                                                                               |
|                        | Time aggregation length       | 1                                                                                                                  |
| <b>Spatial window</b>  | Maximum spatial cluster size  | 50% of population at risk                                                                                          |
| <b>Temporal window</b> | Minimum temporal cluster size | 1 year                                                                                                             |
|                        | Maximum temporal cluster size | 50% of study period                                                                                                |
| <b>Inference</b>       | Number of replications        | 999                                                                                                                |

The table contains a list of the default settings used in performing the clustering analysis using the SaTScan software.
