# Supplementary material for: Spatio-Temporal Distribution of Mycobacterium tuberculosis Complex Strains in Ghana
Source: PubMed Central journal article supplement (PMC5001706; doi:10.1371/journal.pone.0161892), 2016-08-26
Supplement: pone.0161892.s005.pdf [file pone.0161892.s005.pdf]

**S5 Table. Primer Sequence for large sequence polymorphism LSP Assays**

| <b>Region of Difference</b>   | <b>Sequence (5'-3')</b>                 |
|-------------------------------|-----------------------------------------|
| <b>RD4-Flanking Forward</b>   | CTC GTC GAA GGC CAC TAA AG              |
| <b>RD4-Flanking Reverse</b>   | AAG GCG AAC AGA TTC AGC AT              |
| <b>RD9-Flanking Forward</b>   | ACT CCC AGC GCT CGG CGG TGA CGG TAT CGT |
| <b>RD9-Flanking Reverse</b>   | ATT CCG TGG GCG CTG CGG CCA ATG TTT GTT |
| <b>RD12-Flanking Forward</b>  | GCC ATC AAC GTC AAG AAC CT              |
| <b>RD12-Flanking Reverse</b>  | CGG CCA GGT AAC AAG GAG T               |
| <b>RD702-Flanking Forward</b> | TTC CGA GGA CCC GTT GTT GAG TGC         |
| <b>RD702-Flanking Reverse</b> | GGG CGG GTT GGG TTG CTG GTC             |
| <b>RD711-Flanking Forward</b> | GGC CGC CCT GCT CAA GAA CCT             |
| <b>RD711-Flanking Reverse</b> | CCT AGG CCG GCG ACG AAG TG              |

The table contains a list of primer sequences used for the LSP assay
