# Supplementary material for: Spatio-Temporal Distribution of Mycobacterium tuberculosis Complex Strains in Ghana
Source: PubMed Central journal article supplement (PMC5001706; doi:10.1371/journal.pone.0161892), 2016-08-26
Supplement: pone.0161892.s006.pdf [file pone.0161892.s006.pdf]

**S6 Table. Comparison of some risk factors among the two regions**

| <b>Variables</b>                   | <b>North</b>      | <b>South</b>       | <b>P-value</b> | <b>OR</b> | <b>95% CI</b>                           |
|------------------------------------|-------------------|--------------------|----------------|-----------|-----------------------------------------|
| <b><i>Settlement (1938)</i></b>    | <b><i>212</i></b> | <b><i>1726</i></b> |                |           |                                         |
| Rural (152)                        | 151 (71.2%)       | 1 (0.1%)           | 0.0000         | 4154.6    | 6.9e <sup>+2</sup> -4.5e <sup>+15</sup> |
| Urban (1786)                       | 61(28.8%)         | 1725 (99.9%)       | 0.0000         | 0.0       | 0.0-1.4e <sup>-3</sup>                  |
| <b><i>Occupation (1468)</i></b>    | <b><i>168</i></b> | <b><i>1300</i></b> |                |           |                                         |
| Farmer (108)                       | 81 (48.2%)        | 27 (2.1%)          | 0.0000         | 43.6      | 26.4-74.2                               |
| Driver (156)                       | 9 (5.4%)          | 147 (11.3%)        | 0.0163         | 0.4       | 0.2-0.9                                 |
| Constant contact with Cattle (7) * | 5 (3.0%)          | 2 (0.2%)           | 0.0003         | 19.8      | 3.2-209.3                               |
| <b><i>Housing (1459)</i></b>       | <b><i>169</i></b> | <b><i>1290</i></b> |                |           |                                         |
| Compound (1207)                    | 160 (96.7%)       | 1047 (81.2%)       | 0.0000         | 4.1       | 2.1-9.3                                 |
| Self-Contained (252)               | 9 (3.3%)          | 243 (18.8%)        | 0.0000         | 0.2       | 0.1-0.5                                 |
| <b><i>HIV (732)</i></b>            | <b><i>50</i></b>  | <b><i>682</i></b>  |                |           |                                         |
| Positive (102)                     | 3 (6.0%)          | 99 (14.5%)         | 0.1350         | 0.4       | 0.1-1.2                                 |
| Negative (630)                     | 47 (94.0%)        | 583 (85.5%)        | 0.1350         | 2.7       | 0.8-13.6                                |
|                                    |                   |                    |                |           |                                         |

\*there were 5 butchers (Abattoir workers) and 2 farmers who own cattle
