# Supplementary material for: Spatio-Temporal Distribution of Mycobacterium tuberculosis Complex Strains in Ghana
Source: PubMed Central journal article supplement (PMC5001706; doi:10.1371/journal.pone.0161892), 2016-08-26
Supplement: pone.0161892.s007.pdf [file pone.0161892.s007.pdf]

|               |            |                              |                   |            |           |          |
|---------------|------------|------------------------------|-------------------|------------|-----------|----------|
| MTBss         | L4         |                              | Uganda I          | 49         | 2         | 0.07     |
| MTBss         | L4         |                              | Uganda I          | 52         | 2         | 0.07     |
| MTBss         | L4         |                              | Uganda I          | 78         | 1         | 0.07     |
| <b>Specie</b> | <b>SNP</b> | <b>Spoligotyping profile</b> | <b>Sublineage</b> | <b>SIT</b> | <b>No</b> | <b>%</b> |
| MTBss         | L4         |                              | Uganda I          | 848        | 1         | 0.04     |
| MTBss         | L4         |                              | Uganda I          | 524        | 1         | 0.04     |
| MTBss         | L4         |                              | Uganda I          | 712        | 1         | 0.04     |
| MTBss         | L4         |                              | Uganda I          | 1056       | 1         | 0.04     |
| MTBss         | L4         |                              | Uganda I          |            | 22        | 1.00     |
| MTBss         | L4         |                              | Uganda I          |            | 3         | 0.10     |
| MTBss         | L4         |                              | Uganda I          |            | 4         | 0.20     |
| MTBss         | L4         |                              | Uganda II         | 237        | 2         | 0.07     |
| MTBss         | L4         |                              | Uganda II         | 92         | 11        | 0.40     |
| MTBss         | L4         |                              | Uganda II         | 200        | 5         | 0.20     |
| MTBss         | L4         |                              | Uganda II         | 1178       | 4         | 0.20     |
| MTBss         | L4         |                              | Uganda II         |            | 5         | 0.20     |
| MTBss         | L4         |                              | Uganda II         | orphan     | 1         | 0.04     |
| MTBss         | L4         |                              | Uganda II         |            | 6         | 0.20     |
| MTBss         | L4         |                              | Uganda II         |            | 2         | 0.07     |
| MTBss         | L4         |                              | Uganda II         |            | 4         | 0.20     |
| MTBss         | L4         |                              | Uganda II         | orphan     | 1         | 0.04     |
| MTBss         | L4         |                              | Uganda II         |            | 3         | 0.10     |
| MTBss         | L4         |                              | Uganda II         | orphan     | 1         | 0.04     |
| <i>Mafric</i> | L5         |                              | West Africa I     | 319        | 52        | 2.00     |
| <i>Mafric</i> | L5         |                              | West Africa I     | 320        | 10        | 0.40     |
| <i>Mafric</i> | L5         |                              | West Africa I     | 330        | 11        | 0.40     |
| <i>Mafric</i> | L5         |                              | West Africa I     | 331        | 61        | 2.40     |
| <i>Mafric</i> | L5         |                              | West Africa I     | 438        | 14        | 1.00     |
| <i>Mafric</i> | L5         |                              | West Africa I     | 1592       | 2         | 0.07     |
| <i>Mafric</i> | L5         |                              | West Africa I     |            | 50        | 1.96     |
| <i>Mafric</i> | L5         |                              | West Africa I     |            | 10        | 0.40     |
| <i>Mafric</i> | L5         |                              | West Africa I     |            | 11        | 0.40     |
| <i>Mafric</i> | L5         |                              | West Africa I     |            | 11        | 0.40     |
| <i>Mafric</i> | L5         |                              | West Africa I     |            | 11        | 0.40     |
| <i>Mafric</i> | L5         |                              | West Africa I     |            | 30        | 1.20     |
| <i>Mafric</i> | L5         |                              | West Africa I     |            | 1         | 0.04     |
| <i>Mafric</i> | L5         |                              | West Africa I     |            | 2         | 0.07     |
| <i>Mafric</i> | L5         |                              | West Africa I     |            | 2         | 0.07     |
| <i>Mafric</i> | L5         |                              | West Africa I     |            | 1         | 0.04     |

| Specie        | SNP | Spoligotyping profile | Sub lineage   | SIT    | No |      |
|---------------|-----|-----------------------|---------------|--------|----|------|
| <i>Mafric</i> | L5  |                       | West Africa I | orphan | 1  | 0.04 |
| <i>Mafric</i> | L5  |                       | West Africa I | orphan | 1  | 0.04 |
| <i>Mafric</i> | L5  |                       | West Africa I |        | 2  | 0.07 |
| <i>Mafric</i> | L5  |                       | West Africa I | orphan | 1  | 0.04 |
| <i>Mafric</i> | L5  |                       | West Africa I |        | 1  | 0.04 |
| <i>Mafric</i> | L5  |                       | West Africa I | orphan | 1  | 0.04 |
| <i>Mafric</i> | L5  |                       | West Africa I | orphan | 1  | 0.04 |
| <i>Mafric</i> | L5  |                       | West Africa I |        | 3  | 0.12 |
| <i>Mafric</i> | L5  |                       | West Africa I | orphan | 1  | 0.04 |
| <i>Mafric</i> | L5  |                       | West Africa I | orphan | 1  | 0.04 |
| <i>Mafric</i> | L5  |                       | West Africa I |        | 4  | 0.20 |
| <i>Mafric</i> | L5  |                       | West Africa I |        | 2  | 0.07 |
| <i>Mafric</i> | L5  |                       | West Africa I |        | 2  | 0.07 |
| <i>Mafric</i> | L5  |                       | West Africa I |        | 2  | 0.07 |
| <i>Mafric</i> | L5  |                       | West Africa I |        | 1  | 0.04 |
| <i>Mafric</i> | L5  |                       | West Africa I | orphan | 1  | 0.04 |
| <i>Mafric</i> | L5  |                       | West Africa I | orphan | 1  | 0.04 |
| <i>Mafric</i> | L5  |                       | West Africa I |        | 5  | 0.20 |
| <i>Mafric</i> | L5  |                       | West Africa I |        | 2  | 0.07 |
| <i>Mafric</i> | L5  |                       | West Africa I | orphan | 1  | 0.04 |
| <i>Mafric</i> | L5  |                       | West Africa I | orphan | 1  | 0.04 |
| <i>Mafric</i> | L5  |                       | West Africa I |        | 2  | 0.07 |
| <i>Mafric</i> | L5  |                       | West Africa I | orphan | 1  | 0.04 |
| <i>Mafric</i> | L5  |                       | West Africa I | orphan | 1  | 0.04 |
| <i>Mafric</i> | L5  |                       | West Africa I | orphan | 1  | 0.04 |
| <i>Mafric</i> | L5  |                       | West Africa I |        | 2  | 0.07 |

| Specie | SNP | Spoligotyping profile | Sub lineage    | SIT    | No |      |
|--------|-----|-----------------------|----------------|--------|----|------|
| Mafric | L5  |                       | West Africa I  | orphan | 1  | 0.04 |
| Mafric | L5  |                       | West Africa I  |        | 2  | 0.07 |
| Mafric | L5  |                       | West Africa I  | orphan | 1  | 0.04 |
| Mafric | L5  |                       | West Africa I  |        | 4  | 0.20 |
| Mafric | L5  |                       | West Africa I  | orphan | 1  | 0.04 |
| Mafric | L5  |                       | West Africa I  | orphan | 1  | 0.04 |
| Mafric | L5  |                       | West Africa I  | orphan | 1  | 0.04 |
| Mafric | L5  |                       | West Africa I  | orphan | 1  | 0.04 |
| Mafric | L5  |                       | West Africa I  | orphan | 1  | 0.04 |
| Mafric | L5  |                       | West Africa I  | orphan | 1  | 0.04 |
| Mafric | L5  |                       | West Africa I  | orphan | 1  | 0.04 |
| Mafric | L5  |                       | West Africa I  | orphan | 1  | 0.04 |
| Mafric | L6  |                       | West Africa II | 181    | 55 | 2.20 |
| Mafric | L6  |                       | West Africa II | 326    | 40 | 2.00 |
| Mafric | L6  |                       | West Africa II | 1200   | 1  | 0.04 |
| Mafric | L6  |                       | West Africa II | 1867   | 1  | 0.04 |
| Mafric | L6  |                       | West Africa II |        | 4  | 0.20 |
| Mafric | L6  |                       | West Africa II |        | 4  | 0.20 |
| Mafric | L6  |                       | West Africa II | orphan | 1  | 0.04 |
| Mafric | L6  |                       | West Africa II | orphan | 1  | 0.04 |
| Mafric | L6  |                       | West Africa II | orphan | 1  | 0.04 |
| Mafric | L6  |                       | West Africa II |        | 31 | 1.20 |
| Mafric | L6  |                       | West Africa II |        | 3  | 0.12 |
| Mafric | L6  |                       | West Africa II |        | 3  | 0.12 |
| Mafric | L6  |                       | West Africa II | orphan | 1  | 0.10 |
| Mafric | L6  |                       | West Africa II |        | 3  | 0.12 |
| Mafric | L6  |                       | West Africa II |        | 3  | 0.12 |

| Specie    | SNP | Spoligotyping profile | Sub lineage    | SIT    | No | %    |
|-----------|-----|-----------------------|----------------|--------|----|------|
| Mafric    | L6  |                       | West Africa II | orphan | 1  | 0.04 |
| Mafric    | L6  |                       | West Africa II |        | 8  | 0.30 |
| Mafric    | L6  |                       | West Africa II | orphan | 1  | 0.04 |
| Mafric    | L6  |                       | West Africa II | orphan | 1  | 0.04 |
| Mafric    | L6  |                       | West Africa II |        | 7  | 0.27 |
| Mafric    | L6  |                       | West Africa II | orphan | 1  | 0.04 |
| Mafric    | L6  |                       | West Africa II | orphan | 1  | 0.04 |
| Mafric    | L6  |                       | West Africa II | orphan | 1  | 0.04 |
| Mafric    | L6  |                       | West Africa II | orphan | 1  | 0.04 |
| Mafric    | L6  |                       | West Africa II | orphan | 1  | 0.04 |
| Mafric    | L6  |                       | West Africa II | orphan | 1  | 0.04 |
| Mafric    | L6  |                       | West Africa II | orphan | 1  | 0.04 |
| Mafric    | L6  |                       | West Africa II | orphan | 1  | 0.04 |
| M. bovis  |     |                       | BOVIS 1_BCG    | 482    | 2  | 0.07 |
| M. bovis  |     |                       | BOVIS 1        | 1037   | 5  | 0.20 |
| M. bovis  |     |                       | BOVIS          |        | 3  | 0.12 |
| M. bovis  |     |                       | BOVIS          |        | 2  | 0.07 |
| M. bovis  |     |                       | BOVIS          |        | 1  | 0.04 |
| M. bovis  |     |                       | BOVIS          |        | 2  | 0.07 |
| M. caprae |     |                       | caprae         |        | 1  | 0.04 |
