# Supplementary material for: Spatio-Temporal Distribution of Mycobacterium tuberculosis Complex Strains in Ghana
Source: PubMed Central journal article supplement (PMC5001706; doi:10.1371/journal.pone.0161892), 2016-08-26
Supplement: pone.0161892.s008.pdf [file pone.0161892.s008.pdf]

**Table S8: Distribution of Species and Lineages of MTBC**

| Species        | Lineages/species | Sub-Lineages | Number of Isolates (%) |
|----------------|------------------|--------------|------------------------|
| MTBSS          |                  |              | 2019 (79.1%)           |
|                | L1               |              | 36 (1.4%)              |
|                | L2               |              | 77 (3.0%)              |
|                | L3               |              | 23 (0.9%)              |
|                | L4               |              | 1883 (74.3%)*          |
|                |                  | Cameroon     | 1151 (61.1%)*          |
|                |                  | Ghana        | 330 (17.5%)*           |
|                |                  | Haarlem      | 119 (6.3%)*            |
|                |                  | LAM          | 39 (2.1%)*             |
|                |                  | Uganda I     | 38 (2.0%)*             |
|                |                  | Uganda II    | 5 (0.3%)*              |
|                |                  | New-1        | 1 (0.1%)*              |
|                |                  | S            | 3 (0.2%)*              |
|                |                  | H37Rv-like   | 2 (0.2%)*              |
| MAF            |                  |              | 516 (20.3%)            |
|                | L5               |              | 338 (13.3%)            |
|                | L6               |              | 178 (7.0%)             |
| Animal Strains |                  |              | 16 (0.7%)              |
|                | <i>M. bovis</i>  |              | 15 (0.6%)              |
|                | <i>M. caprae</i> |              | 1 (0.0%)               |

\*as proportion of the total number of Lineage 4 strains (1883) and not the total number of MTBC (2551)
